# Norovirus Infection as a Cause of Diarrhea-Associated Benign Infantile Seizures

Shih-Yen Chen,<sup>1,4,a</sup> Chi-Neu Tsai,<sup>4,a</sup> Ming-Wei Lai,<sup>1</sup> Chih-Yen Chen,<sup>5</sup> Kuang-Lin Lin,<sup>2</sup> Tzou-Yien Lin,<sup>3</sup> and Cheng-Hsun Chiu<sup>3</sup>

Divisions of <sup>1</sup>Pediatric Gastroenterology, <sup>2</sup>Pediatric Neurology, and <sup>3</sup>Pediatric Infectious Diseases, Chang Gung Children's Hospital, and <sup>4</sup>Graduate Institute of Clinical Medical Sciences, Chang Gung University College of Medicine, Taoyuan, and <sup>5</sup>Department of Molecular Biotechnology, Da-Yeh University, Changhua, Taiwan

**Background.** Norovirus and rotavirus cause outbreaks of diarrheal disease worldwide. This prospective observational study was undertaken to investigate the clinical characteristics and complications, with a focus on convulsive disorders, of gastroenteritis caused by norovirus and rotavirus in hospitalized pediatric patients in northern Taiwan.

**Methods.** Children hospitalized with acute gastroenteritis in Chang Gung Children's Hospital from August 2004 through January 2007 were enrolled in the study. Rotavirus and norovirus were detected by reverse-transcriptase polymerase chain reaction with fecal specimens and were genotyped by sequence analysis. The symptoms and complications, in particular convulsions, of acute gastroenteritis caused by rotavirus and norovirus were reviewed and compared. The occurrence of convulsions associated with norovirus infection was specifically analyzed and discussed. The neurological outcomes for all norovirus-infected patients with or without convulsions were followed up for 1 year.

**Results.** Among the 353 patients with acute viral gastroenteritis without coinfection, rotavirus and norovirus isolates were detected in 101 patients (28.6%) and 64 patients (18.1%), respectively. We compared the symptoms between the 2 groups and found that rotavirus caused a higher frequency and longer duration of vomiting and a higher body temperature than did norovirus. Norovirus infection, on the other hand, caused significantly longer hospital stays (mean duration of stay [interquartile range], 6 [5–8] days vs. 5 [4–7] days;  $P < .001$ ) and a significantly higher incidence of convulsions than did rotavirus infection (29.7% vs. 5%;  $P < .001$ ). Three of the 19 patients with convulsions showed an abnormal record on electroencephalogram, but none had any neurological sequelae at the subsequent 1-year follow-up. The majority of norovirus strains (41 of the 56 genotypeable strains) belonged to genogroup GGII/4.

**Conclusions.** Norovirus is a major cause of acute gastroenteritis in children. This study identified norovirus as an emerging agent causing convulsive disorder in children, particularly in young infants. Long-term neurological sequelae are uncommon.

Viral acute gastroenteritis (AGE) is one of the most prevalent infectious diseases in the world, and rotavirus and norovirus are the 2 most common viral agents that cause infantile diarrhea. Rotavirus infection results in ~500,000–800,000 childhood deaths annually in underdeveloped countries [1]. Rotavirus infection gen-

erally causes vomiting, watery diarrhea, and occasionally fever. Complications such as dehydration, convulsions, and bowel obstruction have been reported [2, 3]. After 2006, 2 vaccines to prevent rotavirus gastroenteritis were launched in several countries [4, 5].

Norovirus is the second most common cause of diarrhea in children. This virus circulates in community environments, and evidence indicates that it is involved in sporadic cases of AGE in infants and adults [6, 7]. Norovirus can be genetically divided into 5 genogroups (GGI–GGV), of which GGI, GGII, and GGIV cause AGE in humans [8]. Norovirus GGII has caused a global AGE epidemic, and the emergence of the norovirus subgenogroup GGII/4 has been associated with large outbreaks of AGE in the United States, Australia,

Received 19 August 2008; accepted 24 November 2008; electronically published 24 February 2009.

<sup>a</sup> S.-Y.C. and C.-N.T. contributed equally to this article.

Reprints or correspondence: Dr. Cheng-Hsun Chiu, Dept. of Pediatrics, Chang Gung Children's Hospital, 5 Fu-Hsin St., Kweishan 333, Taoyuan, Taiwan (chchiu@adm.cgmh.org.tw).

**Clinical Infectious Diseases** 2009;48:849–55

© 2009 by the Infectious Diseases Society of America. All rights reserved.

1058-4838/2009/4807-0001\$15.00

DOI: 10.1086/597256

New Zealand, Japan, and Taiwan since the late 1990s [9, 10].

Few studies have discussed and compared the clinical manifestations of rotavirus and norovirus infections in children. Uncommon complications, such as convulsion, of viral AGE in children were sporadically reported [11] but not prospectively documented. The purpose of this study was to comprehensively investigate the clinical features, especially infantile convulsions, associated with viral AGE in hospitalized pediatric patients in northern Taiwan.

## PATIENTS AND METHODS

**Patient selection and data collection.** This study was approved by the Institutional Review Board of Chang Gung Memorial Hospital (CGMH 95-1058B), and either the participants or their guardians gave informed consent for both specimen and clinical data collection. Patients aged 3 months to 18 years who were hospitalized at Chang Gung Children's Hospital from August 2004 through January 2007, whose major clinical manifestation was acute nonbloody diarrhea, and who fulfilled the criteria for hospitalization were offered enrollment. Patients were not enrolled if they or their guardians declined to participate or if they were discharged before the study team could approach them. The medical records of the patients were reviewed. Demographic data, details of the disease course (under a prescribed list of clinical features provided by an interview of the child's caregivers or the child), and the results of physical examinations and laboratory testing were collected and analyzed.

**Severity of AGE.** The severity of AGE was evaluated by scoring the frequency and duration of diarrhea and vomiting, electrolyte and dehydration status, and fever, as described elsewhere [12]. A severity score >11 indicated severe AGE [12].

The level of dehydration was defined as mild if patients had a slightly decreased urine output and a normal or slightly increased pulse rate, moderate if patients had tachycardia at rest and dry mucous membranes, and severe if patients showed hypotension and cold, mottled skin [13]. Complications were defined as the occurrence of extraintestinal or unusual presentations of AGE, such as hypoglycemia (serum sugar level, <70 mg/dL), electrolyte imbalance (hyponatremia: serum sodium level, <135 mmol/L; hypokalemia: serum potassium level, <3.5 mmol/L; or hypochloremia: serum chloride level, <98 mmol/L), liver function impairment (serum alanine aminotransferase or aspartate aminotransferase level, >46 IU/L), hypotension (systolic blood pressure, <70 mmHg), or severe hyperthermia (body temperature, >41°C). Leukocytosis was defined as a blood leukocyte count >10<sup>4</sup> leukocytes/mm<sup>3</sup>.

**Sample collection and extraction of viral nucleic acid.** All fecal samples collected from the patients were sent to the clinical microbiology laboratory for bacterial culture of *Salmonella*, *Shigella*, and *Campylobacter* species to exclude patients

with bacterial AGE from the study, as described elsewhere [14]. All samples were stored at -70°C before extraction of viral nucleic acid with a kit (High Pure Viral Nucleic Acid Kit; Roche Diagnostics), which was performed according to the manufacturer's recommendations.

**Detection of viruses by RT-PCR.** The first-strand complementary DNA (cDNA) synthesis for viral nucleic acids was performed according to the manufacturer's recommendations (Transcriptor First Strand cDNA Synthesis Kit; Roche Diagnostics). The PCR primer sets used for detection of rotavirus and norovirus have been described elsewhere [15, 16]. The PCR products were separated on 2% agarose gel, were stained with ethidium bromide, and were visualized using VL PHOTO-print system (ITS Science & Medical).

**Viral DNA sequencing analysis.** Sequencing was used to genotype the rotavirus and norovirus strains that caused AGE in the patients. The PCR products were first purified with a PCR cleanup kit (Qiagen), according to the manufacturer's instructions, before undergoing direct sequencing with the ABI 3730 autosequencer (Applied Biosystems). The sequences obtained were aligned, genotyped, and compared with other sequences available in the GenBank and/or European Molecular Biology Laboratory databases.

**Statistical analysis.** Continuous data were analyzed using the Student's *t* test and were expressed as the mean  $\pm$  SD, and binary data were analyzed using the  $\chi^2$  test. *P* < .05 was considered statistically significant. All tests were analyzed using SAS system software, version 8 for Windows (SAS Institute).

## RESULTS

During the 2.5-year study period, 387 children were admitted to the Department of Pediatric Gastroenterology, Chang Gung Children's Hospital, because of AGE symptoms. Of those children, 15 who had bacterial gastroenteritis and 19 who had viral and bacterial coinfection were excluded from the study. The study included a total of 353 patients with nonbacterial AGE, consisting of 194 boys and 159 girls (male-to-female ratio, 1.22:1). The mean age of the patients was 28.2  $\pm$  23.5 months, and the age range was 3 months to 15.6 years. Most (298 [84.4%]) of the children were <5 years of age, and the mean duration of hospital stay was 5.6  $\pm$  2.9 days (range, 2–20 days).

RT-PCR was used to detect rotavirus and norovirus in the fecal samples. Rotavirus and norovirus isolates were found in 101 patients (28.6%) and 64 patients (18.1%), respectively. Figure 1 shows the seasonal distribution and rates of cases of rotavirus infection and norovirus infection among all patients admitted for treatment during the study period. The number of AGE cases caused by rotavirus and norovirus peaked from late winter to early spring, and the increase in the rate of norovirus infection preceded the increase in the rate of rotavirus infection. The majority of cases of norovirus infection occurred

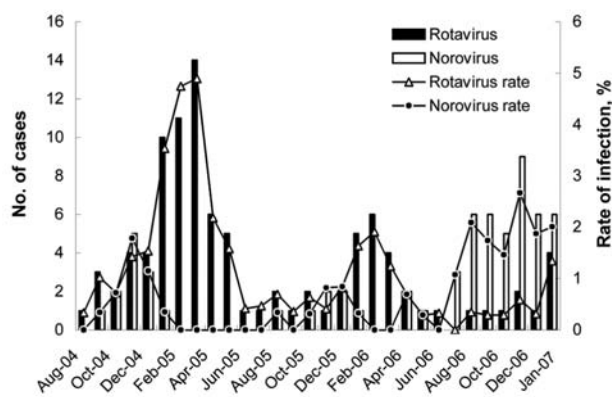

**Figure 1.** Seasonal distribution of the number of cases and the rates of rotavirus and norovirus gastroenteritis among all patients admitted to the Department of Pediatric Gastroenterology, Chang Gung Children's Hospital, Taiwan, from August 2004 through January 2007.

in late 2006, with a higher infection rate that lasted for 6 months, from August 2006 through January 2007.

Rotavirus cDNA derived from the fecal samples was further sequenced. The obtained VP7 sequences (G type) were aligned and pairwise compared with sequences in the NCBI database. Among the 101 specimens that tested positive for rotavirus, G typing of 89 of those specimens showed that 18 (20.2%) were G1, 15 (16.9%) were G2, 24 (27.0%) were G3, 1 (1.1%) was G4, 17 (19.1%) were G9, 4 (4.5%) were mixed types, and 10 (11.2%) were nontypeable. Among the 64 samples that tested positive for norovirus, 56 were successfully genogrouped by sequence analysis. Seven (12.5%) were classified as GGI and 49 (87.5%) as GGII, including 41 (73.2%) that were further subgenogrouped as GGII/4. The genogroups of norovirus could not be determined in the remaining 8 samples.

The symptoms of AGE caused by rotavirus and norovirus are shown in table 1. Statistical analysis showed a significant difference in the symptoms between the 101 children with rotavirus infection and the 64 children with norovirus infection. Rotavirus infection caused a higher frequency of vomiting ( $P = .002$ ) with longer duration ( $P = .01$ ), a higher body temperature (i.e., fever severity;  $P = .005$ ), and more frequent abdominal pain ( $P < .001$ ). These children also showed a higher summarized disease score ( $P < .001$ ). Compared with rotavirus infection, norovirus infection resulted in a significantly longer hospital stay ( $P < .001$ ), and the incidence of convulsion was significantly higher ( $P < .001$ ). No difference between the 2 groups was observed in terms of the occurrence of electrolyte imbalance.

A total of 19 patients with norovirus infection (11 boys and 8 girls) had convulsions associated with AGE. The detailed symptoms in these patients are described in tables 2 and 3. The median age was 18 months (range, 15–21 months). Diarrhea

was observed in all these patients, and vomiting occurred in 12 (63.2%). The majority (15 [78.9%]) of the patients experienced convulsions within 3 days after the onset of AGE symptoms, and 14 patients (73.7%) experienced  $>1$  convulsive episode within 24 h after the first convulsion (5 patients had 2 episodes, 5 had 3, 1 had 4, 1 had 5, and 2 had  $>5$ ; mean number of episodes, 2.8). Two patients presented with status epilepticus during the first episode of convulsion. All convulsions were general tonic-clonic type except for 3 with focal neurological signs (focal seizure with secondary generalization). None of the patients who had convulsions had parents with epilepsy, according to their family history. Mild dehydration was found in 8 patients (42.1%), moderate dehydration was found in 10 patients (52.6%), and severe dehydration was found in 1 patient (5.3%). Five of the 19 patients had electrolyte imbalance (hyponatremia in 4 and hypokalemia in 1), and 4 had hypoglycemia. More than half (10 [52.6%]) of the patients had a fever, but only 2 experienced a body temperature  $>39^{\circ}\text{C}$ . Lumbar puncture was performed in 3 patients with focal neurological signs. Results of cellular and biochemical analysis were negative for norovirus, and RT-PCR showed no norovirus in the CSF. Brain ultrasonography performed for 15 patients showed no abnormalities, except for 1 child who had brain edema. An electroencephalogram (EEG) examination was performed for 10 patients in the acute stage of the infection, and 6 were found to have abnormal EEG records: 3 had cortical dysfunction, 2 had focal spikes, and 1 had epileptiform waves. These patients received anticonvulsant therapy (phenobarbital) for 3 months to 1 year (2 patients received it for 3 months, 1 patient for 9 months, and 3 patients for 1 year), until the EEG results appeared normal in the follow-up examination. None of these patients showed neurological sequelae in the 1-year follow-up period.

We compared the clinical symptoms of patients who experienced convulsions with those of patients who did not (table 3). Convulsions occurred in young children at a median age of 18 months ( $P = .033$ ). Statistical analysis of other clinical and laboratory findings showed no differences between the 2 groups of patients. Patients with convulsions tended to stay in the hospital longer; however, the difference was not statistically significant (mean duration  $\pm$  SD,  $6.5 \pm 1.8$  days vs.  $5.9 \pm 2.3$  days;  $P = .83$ ). Sequence analysis of the 19 norovirus isolates responsible for the convulsions showed that 16 (84.2%) were genogroup GGII/4.

## DISCUSSION

The results of our study showed that AGE caused by rotavirus was more severe than AGE caused by norovirus in terms of the frequency and duration of vomiting, fever, abdominal pain, and overall disease severity score. In our study, the duration of diarrhea was not significantly longer and the frequency of

**Table 1. Demographic and clinical characteristics of pediatric patients with acute gastroenteritis caused by rotavirus and norovirus.**

| Characteristic                              | Rotavirus<br>(n = 101) | Norovirus<br>(n = 64) | P     |
|---------------------------------------------|------------------------|-----------------------|-------|
| <b>Demographic</b>                          |                        |                       |       |
| Age, months                                 | 20 (12–31)             | 22 (13–35)            | .47   |
| Male-to-female ratio                        | 60:41                  | 39:25                 | .85   |
| <b>Clinical</b>                             |                        |                       |       |
| Frequency of diarrhea, times per day        | 5 (3–7)                | 4 (3–6)               | .28   |
| Duration of diarrhea, days                  | 4 (3–6)                | 4 (3–5)               | .81   |
| Frequency of vomiting, times per day        | 3 (1–4)                | 2 (1–3)               | .002  |
| Duration of vomiting, days                  | 2 (1–3)                | 1 (0–2)               | .01   |
| Fever severity score                        | 1 (0–2)                | 0 (0–1)               | .005  |
| Disease severity score                      | 10 (8–12)              | 8 (6–10)              | <.001 |
| Abdominal pain                              | 48 (47.5)              | 13 (20.3)             | <.001 |
| Occult blood in stool                       | 26 (25.7)              | 9 (14.1)              | .07   |
| Length of hospital stay, days               | 5 (4–7)                | 6 (5–8)               | <.001 |
| <b>Associated symptoms or complications</b> |                        |                       |       |
| Hypoglycemia                                | 21 (20.8)              | 13 (20.3)             | .94   |
| Electrolyte imbalance                       | 24 (19.8)              | 9 (14.1)              | .13   |
| Convulsion                                  | 5 (5)                  | 19 (29.7)             | <.001 |
| <b>Laboratory findings</b>                  |                        |                       |       |
| Leukocytosis                                | 48 (47.5)              | 26 (40.6)             | .39   |
| C-reactive protein, mg/L                    | 11 (4–28)              | 6 (2–15)              | .13   |

**NOTE.** Data are median value (interquartile range) or no. (%) of patients, unless otherwise specified.

diarrhea was not significantly higher among children who had norovirus infection than among children who had rotavirus infection. On the other hand, norovirus infection resulted in longer hospital stays and a significantly higher incidence of convulsions, compared with rotavirus infection. Such a high rate of convulsions in hospitalized patients with norovirus infection might be the reason for the prolonged hospital stays, but confirmation of this inference requires further studies.

Norovirus is a more common cause of AGE in children than was previously recognized [17–21]. Norovirus outbreaks have placed a great burden on economic and health resources and have called attention from around the world to the threat that the virus poses [17–21]. Humans of any age can be infected by norovirus, but seroepidemiological surveys demonstrated that antibody (65% against recombinant Norwalk virus and 70% against Mexican virus) was acquired at an early age, indicating that first exposure to the virus occurred early in life [22]. In accord with previous studies, we found that GGII was the most frequently detected genogroup of norovirus strains in this study [23]. The majority of the viruses were further subclassified as GGII/4 group, which has been documented to cause a global epidemic of AGE [24].

The seasonal distribution revealed that rotavirus peaked in the winter, and norovirus was predominant in early winter, although this trend was subtle. Over the 3 consecutive winter

seasons investigated in this study, norovirus peaked ahead of rotavirus and decreased before the rotavirus infection started to increase. A similar situation was reported in a previous study [25]. The reasons for the different seasonal distribution should be studied further. The 4 major rotavirus genotypes (G1, G2, G3, and G9) found in this study are either included in or cross-protected by the reassortant pentavalent rotavirus vaccine containing human serotypes G1, G2, G3, G4, and P[8] [5]. Therefore, most of the rotavirus infections in Taiwan could be prevented by the current rotavirus vaccine. The interplay of rotavirus and norovirus, which cause similar diseases in humans, especially in infants and young children, is a concern, given that effective prevention of rotavirus-associated gastroenteritis by rotavirus vaccine has resulted in an overall reduction of 85%–95% in the number of cases of severe AGE of any cause [5]. There is no vaccine available yet to prevent norovirus infection, but the epidemiology of norovirus infection after universal use of rotavirus vaccine should be carefully monitored.

In 1982, Morooka [26] first described an entity of benign infantile seizures associated with AGE in Japan. It is characterized by nonfebrile generalized seizures associated with symptoms of gastroenteritis in previously healthy patients aged 6 months to 3 years. Rotavirus has been reported to cause benign infantile seizures [27, 28]. Our study showed a significantly

**Table 2. Demographic and clinical characteristics of 19 children with convulsions caused by norovirus infection.**

| Age in months, sex | Fever | Symptom(s)                        | Onset, days after AGE | Electrolyte imbalance | Hypoglycemia | EEG findings         | Recurrence within 24 h |
|--------------------|-------|-----------------------------------|-----------------------|-----------------------|--------------|----------------------|------------------------|
| 18, M              | No    | Mild dehydration                  | 4                     | No                    | No           | No abnormalities     | Yes                    |
| 18, M              | Yes   | Vomiting and mild dehydration     | 4                     | No                    | No           | ND                   | No                     |
| 18, M              | Yes   | Mild dehydration                  | 3                     | No                    | No           | ND                   | No                     |
| 18, F              | Yes   | Vomiting and moderate dehydration | 2                     | No                    | Yes          | Cortical dysfunction | Yes                    |
| 21, M              | No    | Vomiting and moderate dehydration | 2                     | No                    | No           | ND                   | Yes                    |
| 22, F              | Yes   | Mild dehydration                  | 3                     | Hypokalemia           | No           | Focal spikes         | Yes                    |
| 9, F               | Yes   | Vomiting and moderate dehydration | 5                     | No                    | ND           | Focal spikes         | Yes                    |
| 18, F              | Yes   | Moderate dehydration              | 3                     | No                    | No           | Epileptiform waves   | No                     |
| 17, M              | Yes   | Vomiting and moderate dehydration | 1                     | No                    | No           | ND                   | Yes                    |
| 22, F              | Yes   | Vomiting and moderate dehydration | 3                     | No                    | Yes          | ND                   | No                     |
| 12, M              | No    | Vomiting and mild dehydration     | 2                     | No                    | Yes          | ND                   | Yes                    |
| 15, F              | Yes   | Vomiting and moderate dehydration | 6                     | Hyponatremia          | No           | ND                   | Yes                    |
| 3, M               | No    | Vomiting and moderate dehydration | 2                     | No                    | ND           | Cortical dysfunction | Yes                    |
| 24, M              | No    | Vomiting and mild dehydration     | 2                     | Hyponatremia          | No           | ND                   | Yes                    |
| 15, M              | No    | Vomiting and severe dehydration   | 3                     | Hyponatremia          | Yes          | No abnormalities     | Yes                    |
| 13, F              | Yes   | Moderate dehydration              | 3                     | Hyponatremia          | No           | Cortical dysfunction | Yes                    |
| 23, M              | No    | Vomiting and moderate dehydration | 3                     | No                    | No           | No abnormalities     | Yes                    |
| 17, M              | No    | Mild dehydration                  | 2                     | No                    | ND           | ND                   | No                     |
| 24, F              | No    | Mild dehydration                  | 1                     | No                    | ND           | No abnormalities     | Yes                    |

**NOTE.** All patients exhibited diarrhea. AGE, acute gastroenteritis; EEG, electroencephalogram; ND, not done.

higher incidence of convulsions associated with norovirus infection, compared with the incidence of convulsions associated with rotavirus infection (29.7% vs. 5%). The incidence of rotavirus-associated convulsions (5%) was similar to that previously reported (~5.7%) by Wong [29]. The detection of a small, round virus similar to norovirus in stool samples from patients with symptoms of infantile benign convulsions has been previously reported [25, 30]. The extremely high rate of

convulsive disorder among hospitalized children with norovirus infection in our study is impressive, although norovirus has been described as an important agent causing gastroenteritis and convulsions in children during winter [11]. We identified the following features of norovirus infection-associated seizures in this study: seizures often occurred in a cluster but without focal signs, and recurrence within 24 h was very common. Furthermore, fever frequently accompanied the convulsions,

**Table 3. Comparison of clinical presentations of norovirus-infected children with convulsions and those without convulsions.**

| Characteristic                       | Convulsion (n = 19) | No convulsion (n = 45) | P   |
|--------------------------------------|---------------------|------------------------|-----|
| Demographic                          |                     |                        |     |
| Age, months                          | 18 (15–21)          | 33 (12–50)             | .03 |
| Male-to-female ratio                 | 11:8                | 28:17                  | .75 |
| Clinical                             |                     |                        |     |
| Frequency of diarrhea, times per day | 4 (3–6)             | 5 (3–8)                | .08 |
| Duration of diarrhea, days           | 4 (3–7)             | 4 (3–8)                | .94 |
| Frequency of vomiting, times per day | 2 (0–4)             | 2 (0–5)                | .76 |
| Duration of vomiting, days           | 1 (0–3)             | 1 (0–3)                | .93 |
| Fever                                | 10 (52.6)           | 23 (51.1)              | .91 |
| Disease severity score               | 8 (7–9)             | 9 (7–10)               | .29 |
| C-reactive protein value, mg/L       | 12 (2–30)           | 10 (2–23)              | .83 |
| Occult blood in stool                | 2 (10.5)            | 7 (15.6)               | .58 |
| Length of hospital stay, days        | 6 (4–8)             | 6 (4–9)                | .83 |
| Hypoglycemia                         | 2 (10.5)            | 11 (24.4)              | .08 |
| Electrolyte imbalance                | 5 (26.3)            | 4 (8.9)                | .07 |

**NOTE.** Data are median value (interquartile range) or no. (%) of patients, unless otherwise specified.

but a severe fever (body temperature,  $>39^{\circ}\text{C}$ ) was uncommon. All these features are unusual in benign convulsions with mild gastroenteritis (defined as seizures accompanying symptoms of mild diarrhea without signs of dehydration or electrolyte derangement and with a temperature  $<38^{\circ}\text{C}$ ). On the other hand, the time from the onset of gastroenteritis symptoms to convulsion in norovirus infection (mean, 2.8 days; range, 1–6 days) is similar to the time from the onset of gastroenteritis symptoms to convulsion reported for benign afebrile seizures [31]. The age distribution of our patients with convulsion is similar to that of patients with rotavirus-associated seizures [32–34]. However, a recent report described a significantly younger age for norovirus-associated seizures, compared with the age for rotavirus-associated seizures [11]. Young age may be a risk factor for convulsion in children with norovirus infection; our data showed that patients who experienced convulsions were significantly younger than those who did not. Most of the convulsions were benign; only 6 patients received short-course anticonvulsant therapy. None of these patients had any neurological sequelae.

In conclusion, rotavirus and norovirus are both responsible for severe symptoms in infants. Our study highlights the clinical importance of norovirus and the need for future studies of the interplay between rotavirus and norovirus as causes of gastrointestinal infections. Norovirus infection was associated with a higher rate of convulsion in young children than was previously recognized. In view of the high extraintestinal morbidity, the development of a norovirus vaccine is of paramount importance.

## Acknowledgments

We thank Dr. Jinn-Jim Lin for his valuable comments on this study. We are also grateful to all our colleagues in the Division of Pediatric Gastroenterology, Chang Gung Children's Hospital, for their help in the enrollment of the patients and collection of specimens.

**Potential conflicts of interest.** All authors: no conflicts.

## References

1. Wilhelmi I, Roman E, Sanchez-Fauquier A. Viruses causing gastroenteritis. *Clin Microbiol Infect* **2003**; 9:247–62.
2. Anderson EJ, Weber SG. Rotavirus infection in adults. *Lancet Infect Dis* **2004**; 4:91–9.
3. Clark B, McKendrick M. A review of viral gastroenteritis. *Curr Opin Infect Dis* **2004**; 17:461–9.
4. De Vos B, Vesikari T, Linhares AC, et al. A rotavirus vaccine for prophylaxis of infants against rotavirus gastroenteritis. *Pediatr Infect Dis J* **2004**; 23(Suppl):S179–82.
5. Vesikari T, Matson DO, Dennehy P, et al. Safety and efficacy of a pentavalent human-bovine (WC3) reassortant rotavirus vaccine. *N Engl J Med* **2006**; 354:23–33.
6. Gotz H, Ekdahl K, Lindback J, de Jong B, Hedlund KO, Giesecke J. Clinical spectrum and transmission characteristics of infection with Norwalk-like virus: findings from a large community outbreak in Sweden. *Clin Infect Dis* **2001**; 33:622–8.
7. Moe CL, Christmas WA, Echols LJ, Miller SE. Outbreaks of acute gastroenteritis associated with Norwalk-like viruses in campus settings. *J Am Coll Health* **2001**; 50:57–66.
8. Zheng DP, Ando T, Fankhauser RL, Beard RS, Glass RI, Monroe SS. Norovirus classification and proposed strain nomenclature. *Virology* **2006**; 346:312–23.
9. Fankhauser RL, Monroe SS, Noel JS, et al. Epidemiologic and molecular trends of “Norwalk-like viruses” associated with outbreaks of gastroenteritis in the United States. *J Infect Dis* **2002**; 186:1–7.
10. Bull RA, Tu ET, McIver CJ, Rawlinson WD, White PA. Emergence of a new norovirus genotype II.4 variant associated with global outbreaks of gastroenteritis. *J Clin Microbiol* **2006**; 44:327–33.
11. Kawano G, Oshige K, Syutou S, et al. Benign infantile convulsions associated with mild gastroenteritis: a retrospective study of 39 cases including virological tests and efficacy of anticonvulsants. *Brain Dev* **2007**; 29:617–22.
12. Ruuska T, Vesikari T. Rotavirus disease in Finnish children: use of numerical scores for clinical severity of diarrhoeal episodes. *Scand J Infect Dis* **1990**; 22:259–67.
13. Burkhart DM. Management of acute gastroenteritis in children. *Am Fam Physician* **1999**; 60:2555–63.
14. Chen SY, Chang YC, Lee YS, et al. Molecular epidemiology and clinical manifestations of viral gastroenteritis in hospitalized pediatric patients in northern Taiwan. *J Clin Microbiol* **2007**; 45:2054–7.
15. O'Neill HJ, McCaughey C, Coyle PV, Wyatt DE, Mitchell F. Clinical utility of nested multiplex RT-PCR for group F adenovirus, rotavirus and Norwalk-like viruses in acute viral gastroenteritis in children and adults. *J Clin Virol* **2002**; 25:335–43.
16. Yan H, Yagyu F, Okitsu S, Nishio O, Ushijima H. Detection of norovirus (GI, GII), sapovirus and astrovirus in fecal samples using reverse transcription single-round multiplex PCR. *J Virol Methods* **2003**; 114:37–44.
17. Phan TG, Okame M, Nguyen TA, et al. Human astrovirus, norovirus (GI, GII), and sapovirus infections in Pakistani children with diarrhea. *J Med Virol* **2004**; 73:256–61.
18. Jiang X, Turf E, Hu J, et al. Outbreaks of gastroenteritis in elderly nursing homes and retirement facilities associated with human caliciviruses. *J Med Virol* **1996**; 50:335–41.
19. Symes SJ, Gunsekere IC, Marshall JA, Wright PJ. Norovirus mixed infection in an oyster-associated outbreak: an opportunity for recombination. *Arch Virol* **2007**; 152:1075–86.
20. Hewitt J, Bell D, Simmons GC, Rivera-Aban M, Wolf S, Greening GE. Gastroenteritis outbreak caused by waterborne norovirus at a New Zealand ski resort. *Appl Environ Microbiol* **2007**; 73:7853–7.
21. Ljubic-Sternak S, Lukic-Grlic A, Fiore L, Di Bartolo I, Ruggeri FM, Bukovskisimonoski GS. Norovirus genotypes involved in the outbreaks of gastroenteritis in Croatia during the winter season 2004–2005. *Acta Virol* **2007**; 51:189–94.
22. Jing Y, Qian Y, Huo Y, Wang LP, Jiang X. Seroprevalence against Norwalk-like human caliciviruses in Beijing, China. *J Med Virol* **2000**; 60:97–101.
23. Wu FT, Oka T, Katayama K, et al. Genetic diversity of noroviruses in Taiwan between November 2004 and March 2005. *Arch Virol* **2006**; 151:1319–27.
24. Tu ET, Bull RA, Greening GE, et al. Epidemics of gastroenteritis during 2006 were associated with the spread of norovirus GII.4 variants 2006a and 2006b. *Clin Infect Dis* **2008**; 46:413–20.
25. Ushijima H. Molecular epidemiology of Norwalk virus [in Japanese]. *Nippon Rinsho* **2002**; 60:1143–7.
26. Morooka K. Convulsions and mild diarrhea [in Japanese]. *Shonika Rinsho (Tokyo)* **1982**; 23:131–7.
27. Luque-Moreno A, Pérez-Alvarez F, Bergada-Maso A, et al. Rotavirus and its role in the genesis of afebrile seizures. *Rev Neurol* **2007**; 44:318–9.
28. Narchi H. Benign afebrile cluster convulsions with gastroenteritis: an observational study. *BMC Pediatr* **2004**; 4:2.

29. Wong V. Acute gastroenteritis-related encephalopathy. *J Child Neurol* **2001**; 16:906–10.
30. Abe T, Kobayashi M, Araki K, et al. Infantile convulsions with mild gastroenteritis. *Brain Dev* **2000**; 22:301–6.
31. Komori H, Wada M, Eto M, Oki H, Aida K, Fujimoto T. Benign convulsions with mild gastroenteritis: a report of 10 recent cases detailing clinical varieties. *Brain Dev* **1995**; 17:334–7.
32. Hung JJ, Wen HY, Yen MH, et al. Rotavirus gastroenteritis associated with afebrile convulsion in children: clinical analysis of 40 cases. *Chang Gung Med J* **2003**; 26:654–9.
33. Uemura N, Okumura A, Negoro T, Watanabe K. Clinical features of benign convulsions with mild gastroenteritis. *Brain Dev* **2002**; 24:745–9.
34. Tanabe T, Hara K, Kashiwagi M, et al. Classification of benign infantile afebrile seizures. *Epilepsy Res* **2006**; 70(Suppl 1):S185–9.
